# Supplementary material for: Staggering thermal transport in 2H-TiS 2 dominated by acoustic-like optical phonons
Source: Royal Society of Chemistry journal article supplement (doi:10.1039/d5nr04709a), 2026-01-01
Supplement: d5nr04709a1.pdf [file d5nr04709a1.pdf]

**Supplemental Materials for**  
**Staggering thermal transport in 2H-TiS<sub>2</sub> dominated by acoustic-like**  
**optical phonons**

Zhuo Zhao<sup>1,2</sup>, Jian Zhang<sup>1,2\*</sup>, Yu-Jia Zeng<sup>3</sup>, Yuan Cheng<sup>4,5</sup>, Wu-Xing Zhou<sup>3\*</sup>, Gang  
Zhang<sup>1,2\*</sup>

<sup>1</sup> School of Materials Science and Engineering, Beijing Institute of Technology, Beijing 100081, China

<sup>2</sup> Yangtze Delta Region Academy in Jiaxing, Beijing Institute of Technology, Jiaxing 314019, China

<sup>3</sup> School of Materials Science and Engineering, Hunan University of Science and Technology, Xiangtan 411201, China

<sup>4</sup> Monash Suzhou Research Institute, Monash University, Suzhou 215000, China;

<sup>5</sup> Department of Materials Science and Engineering, Monash University, Clayton VIC 3800, Australia

Corresponding author. E-mail: zhangjian@bit.edu.cn; wuxingzhou@hnu.edu.cn; gangzhang@bit.edu.cn

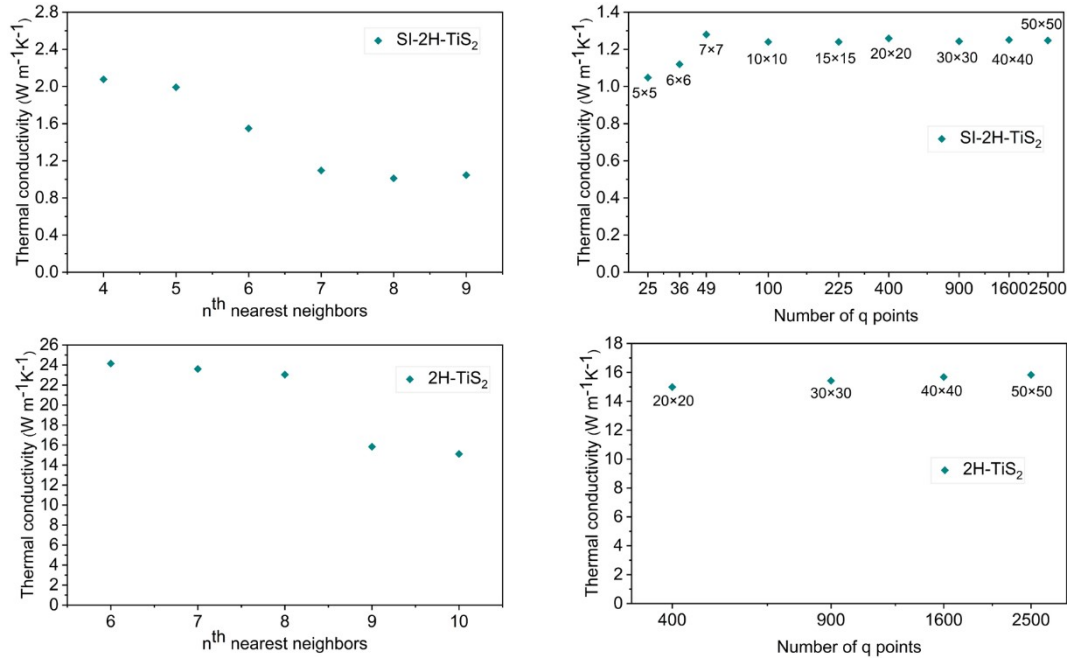

**Figure S1.** Neighbor number and grid tests for 2H-TiS<sub>2</sub> and SI-2H-TiS<sub>2</sub>.

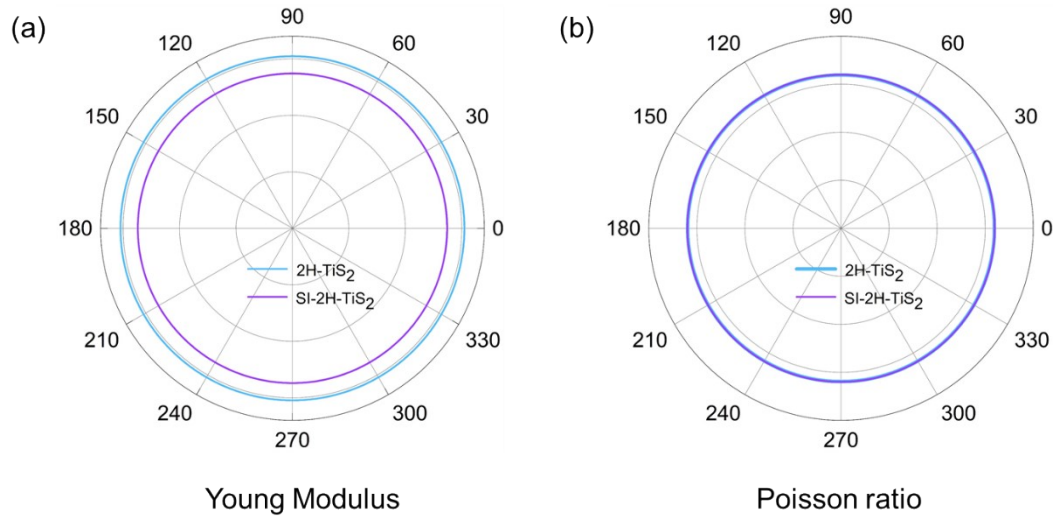

**Figure S2.** Young's modulus and Poisson's ratio of 2H-TiS<sub>2</sub> and SI-2H-TiS<sub>2</sub>.

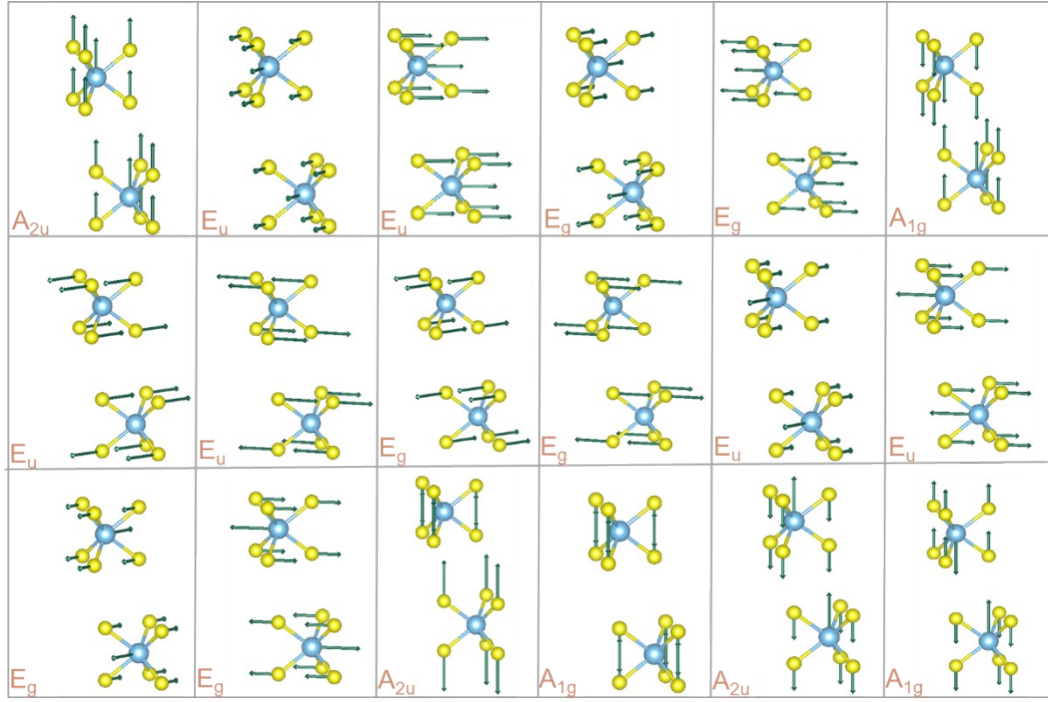

**Figure S3.** The vibrational patterns at the  $\Gamma$  point for the 2H-TiS<sub>2</sub> based on phonon eigenvectors.

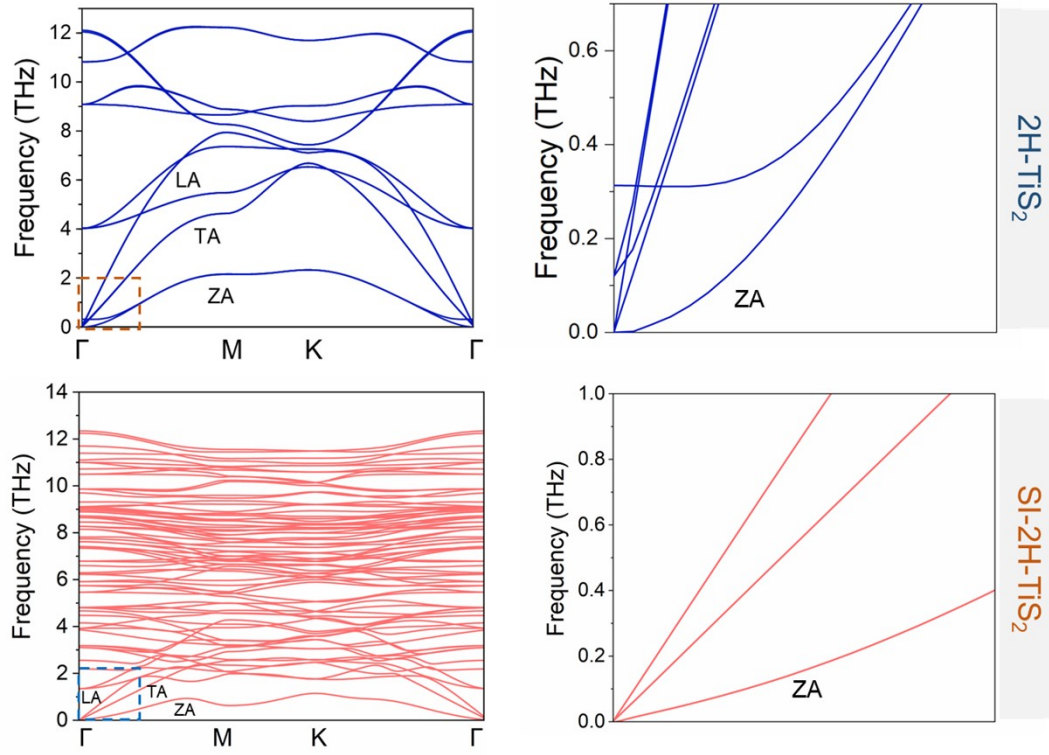

**Figure S4.** The phonon dispersion along the high-symmetry path of 2H-TiS<sub>2</sub> and SI-2H-TiS<sub>2</sub>, as well as a zoomed-in view of the  $\Gamma$  point, reveals that the ZA mode exhibits quadratic dispersion.
